# Supplementary material for: Solid Self-Nanoemulsifying Drug Delivery Systems of Furosemide: In Vivo Proof of Concept for Enhanced Predictable Therapeutic Response
Source: MDPI journal article supplement (doi:10.3390/ph17040500), 2024-04-14
Supplement: s1 [file s1]

**Supplementary Data**

**Supplementary Table S1**      Percent transmittance values of a combination of Surfactant + oils, Surfactant + co-surfactant, L-SEDDS-FSM and S-SEDDS-FSM after emulsification.

| Formulations  | Figures                                                                            | UV results                                                                         |
|---------------|------------------------------------------------------------------------------------|------------------------------------------------------------------------------------|
| Tween 20+ oil |  |  |

Tween 80+ oil

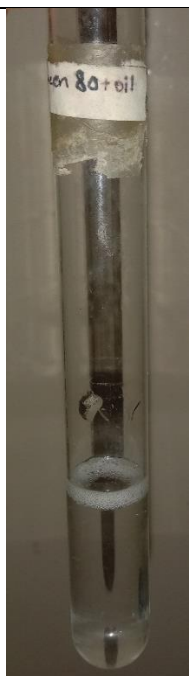

T: 98.7%A: 0.006

Cremophor EL+  
oil

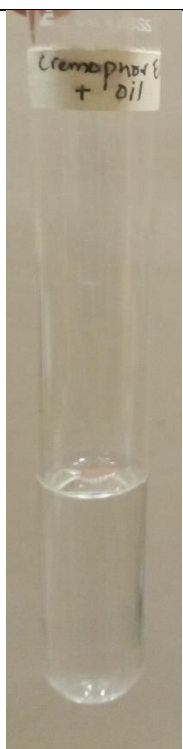

T: 98.5%A: 0.007

|                      |                                                                                    |                                                                                     |
|----------------------|------------------------------------------------------------------------------------|-------------------------------------------------------------------------------------|
| <p>Tween 20+ PEG</p> |   |   |
| <p>Tween 80+ PEG</p> |  |  |

Cremophor EL  
+ PEG

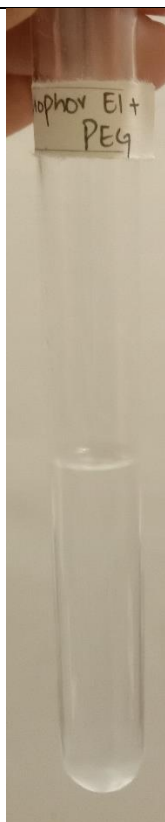

T: 99.0%A: 0.004

L-SEDDS-FSM

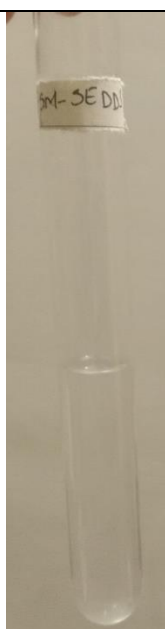

T: 98.2%A: 0.008

S-SEDDS-FSM

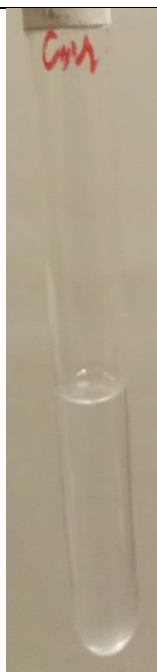

T: 98.5%A: 0.007

**Supplementary Figure S1** Thermodynamic stability assessment of L-SED DS-BLK and L-SED DS-FSM after a freeze-thaw cycle to assess the stability of the formulation.

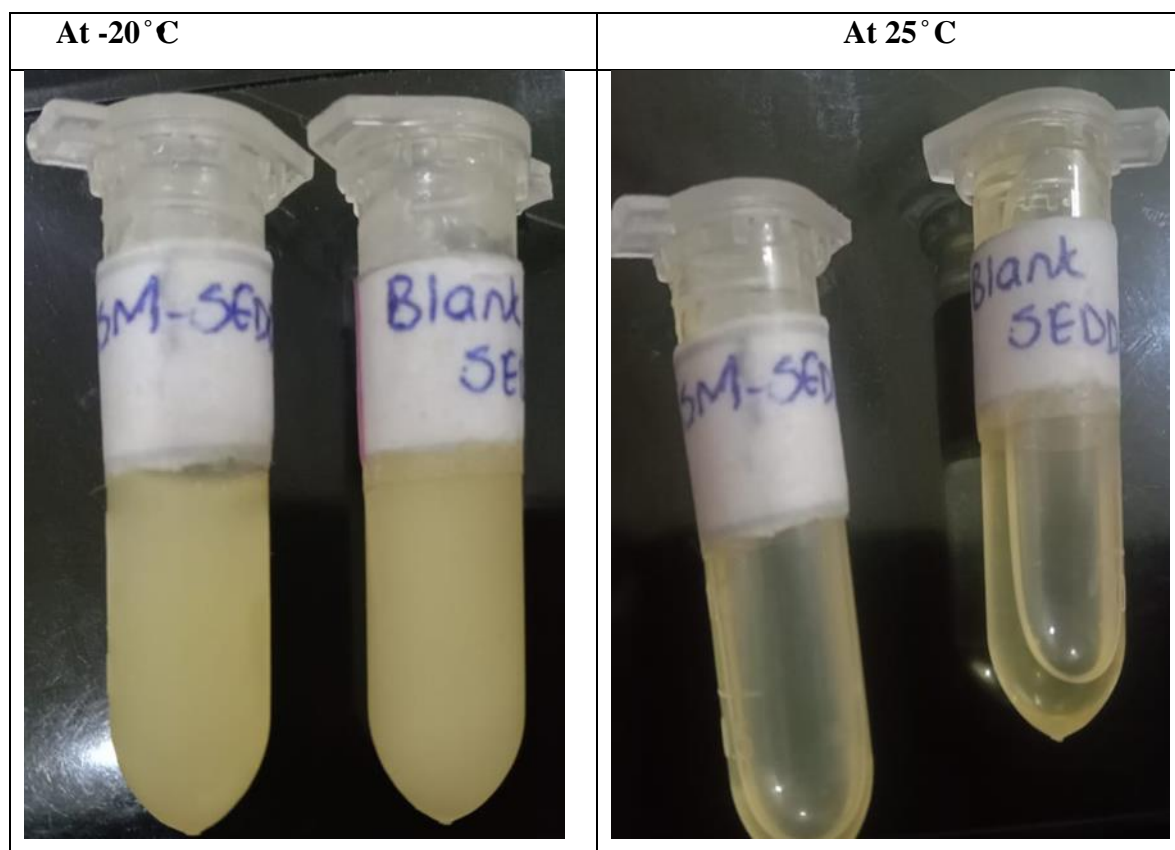

**Heating cooling cycle:**

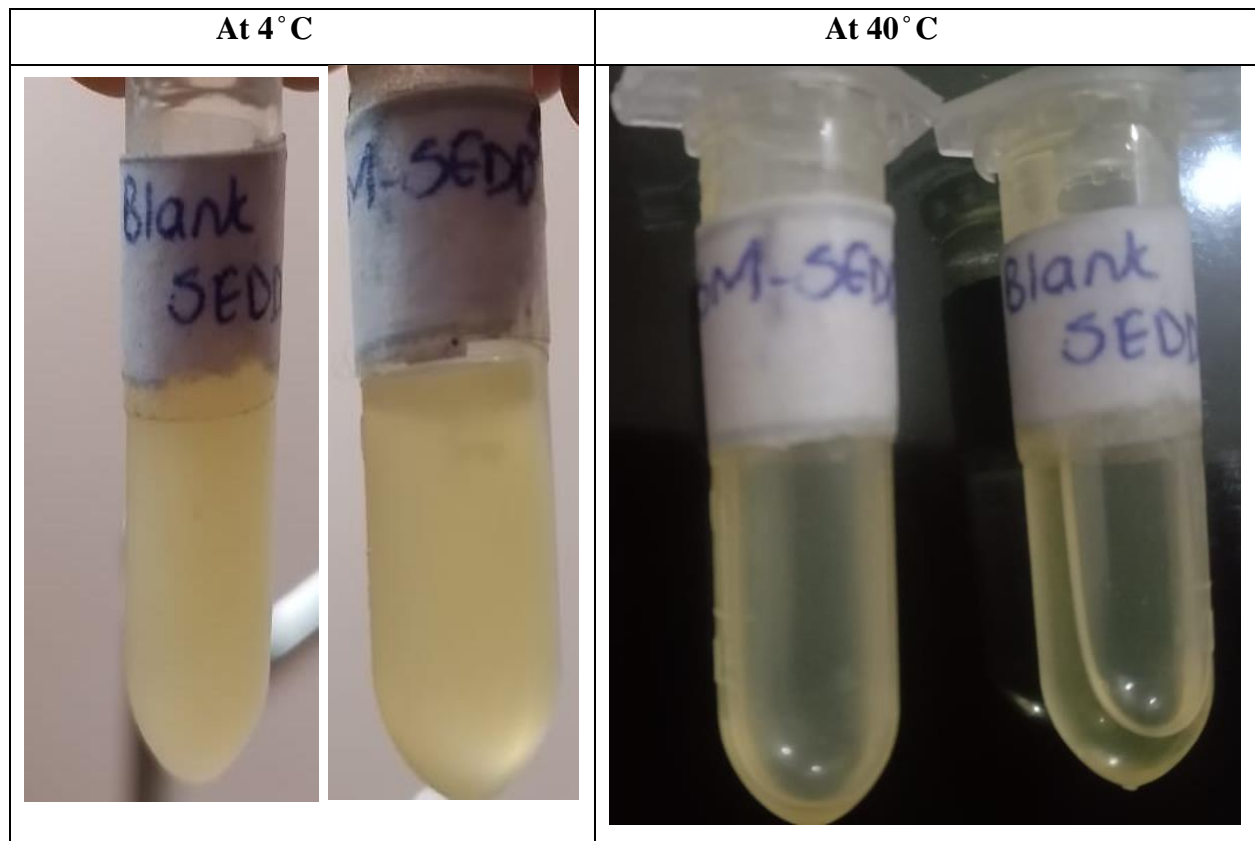

**Supplementary Figure S2** Robustness to dilution and stability studies after diluting L-SEDDS-FSM and S-SEDDS-FSM in 1:100 and 1;1000 indicating no precipitation or phase separation.

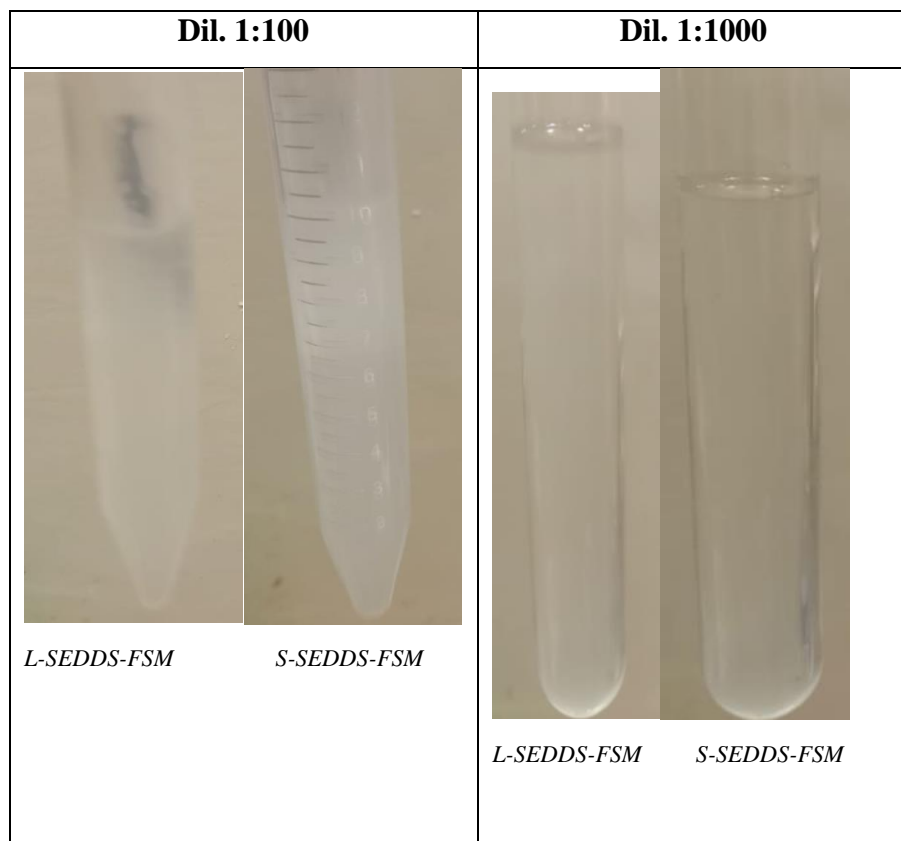



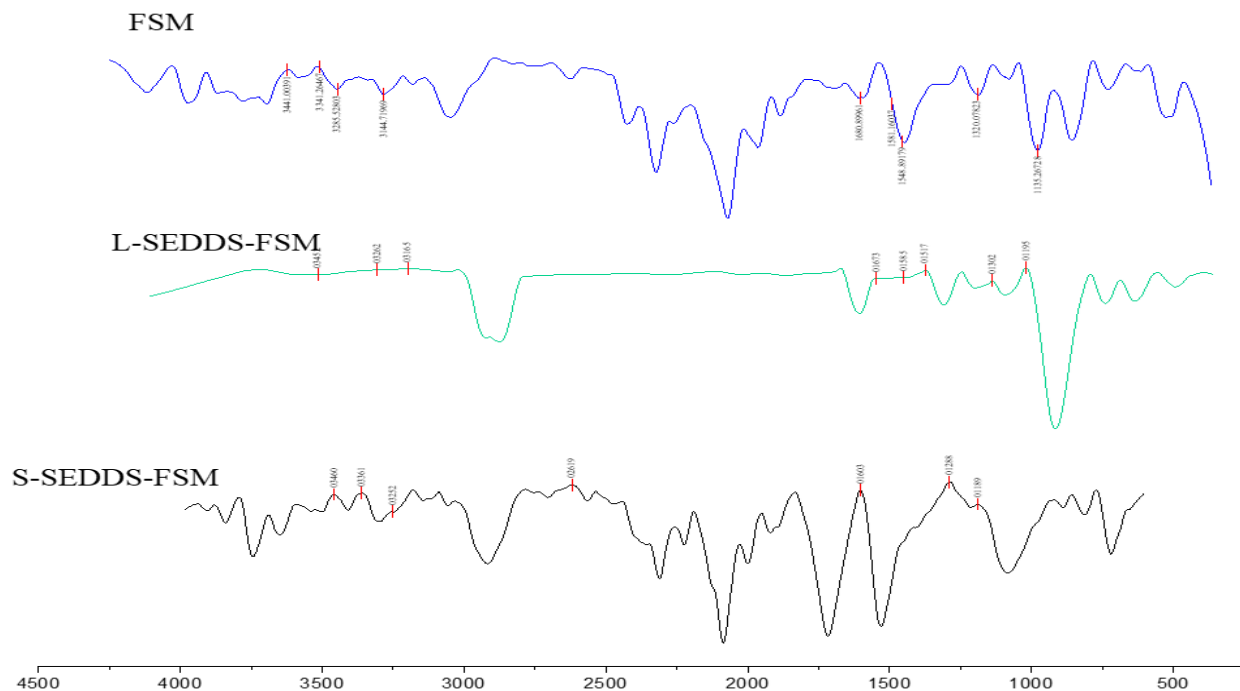

**Supplementary Figure S3.** ATR-FTIR spectrum of FSM, L-SEDDS-FSM and S-SEDDS-FSM showing incorporation of FSM inside both formulations.
